# Supplementary material
Source: publisher figshare collection journal article supplement (https://frontiersin.figshare.com/ndownloader/files/28240824)
Supplement: Supplementary file [file 28240824]

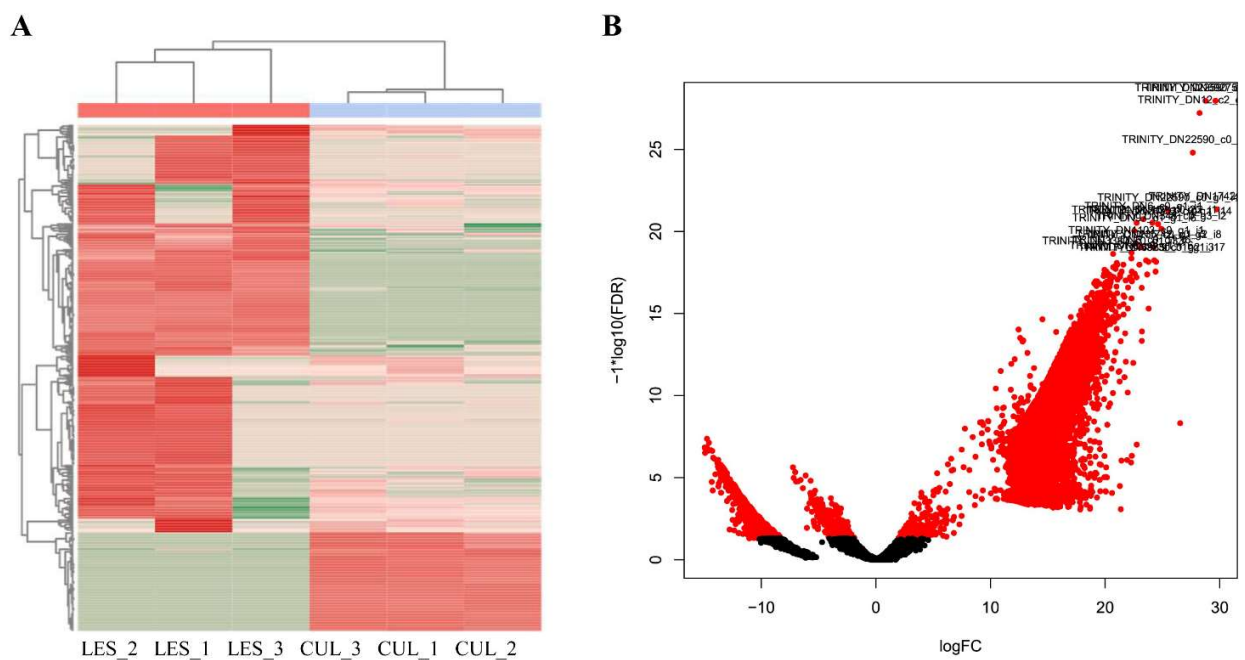

**Supplementary Figure 4.** Differential gene expression in *Neoparamoeba perurans* in the lesion of amoebic gill disease in Atlantic salmon compared to cultured *N. perurans* trophozoites. **(A)** Heat map shows hierarchical clustering of differentially expressed genes (rows) with differential expression among replicates from a gill biopsy of the lesion (LES) and cultured trophozoites (CUL) from *N. perurans*. Expression values are log<sub>2</sub>-transformed and median-centered by gene. **(B)** Volcano plot of differentially expressed genes in the gill biopsy lesion, highlighting genes with a minimum 2-fold change in expression ( $P < 0.05$ ) compared to in vitro cultured *N. perurans* trophozoites.
